# Supplementary material for: A facile strategy for fabricating particle-on-flower Au-Cu3BiS3nanostructures for enhanced photoelectrocatalytic activity in water splitting
Source: Royal Society of Chemistry journal article supplement (doi:10.1039/d0nj03448g), 2020-12-10
Supplement: d0nj03448g1.pdf [file d0nj03448g1.pdf]

## Supplementary information

# A facile strategy to fabricate particle-on-flower Au-Cu<sub>3</sub>BiS<sub>3</sub> nanostructures for enhanced photoelectrocatalytic activity in water splitting

Jiajia Li<sup>a\*</sup>, Yun Zhao<sup>b</sup>, Xiuxun Han<sup>c\*</sup>, DingShu Xiao<sup>a,d</sup>

<sup>a</sup> School of Chemistry and Materials Engineering, Huizhou University, Huizhou 516007, China.

<sup>b</sup> Laboratory of Clean Energy Chemistry and Materials, Lanzhou Institute of Chemical Physics, Chinese Academy of Sciences, Lanzhou 730000, P. R. China.

<sup>c</sup> Institute of Engineering Research, Jiangxi University of Science and Technology, Ganzhou 341000, China.

<sup>d</sup> Dayawan Chemical Engineering Research Institute, Huizhou University, Huizhou 516081, China.

E-mail address: ljjdyx@hzu.edu.cn; xxhan@licp.cas.cn

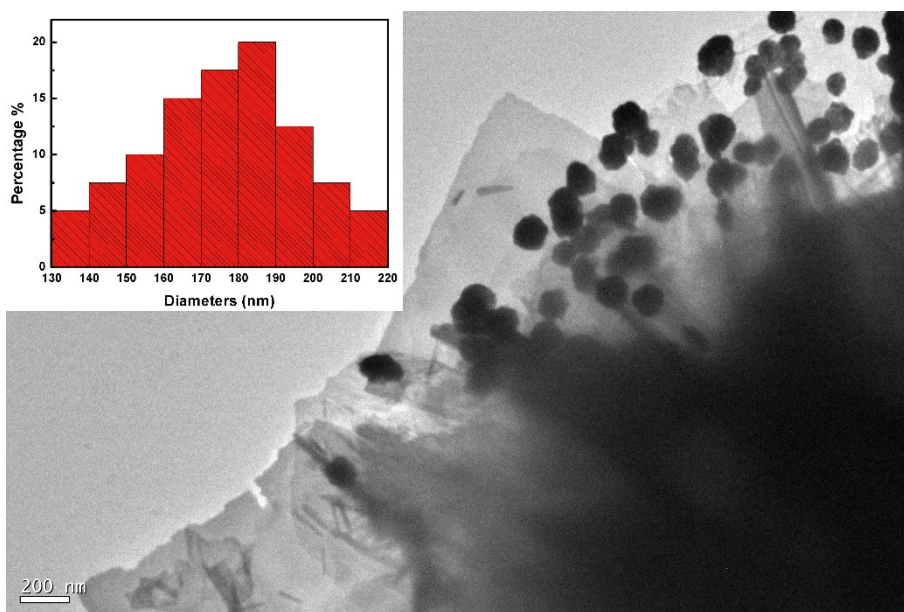

Fig. S1 Representative TEM image of 20% A@C composite and histogram of Au NPs.

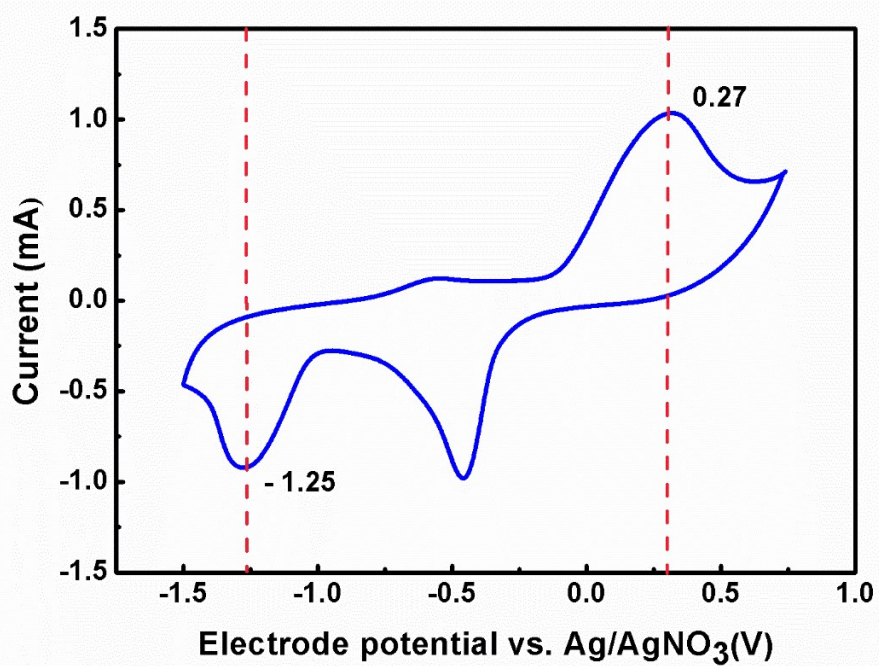

Fig. S2 Cyclic voltammety scan of  $\text{Cu}_3\text{BiS}_3$  sample in TBAPF<sub>6</sub> anhydrous acetonitrile electrolyte. The dash line highlights the oxidation and reduction potential used for calculation of the VBM and CBM position of  $\text{Cu}_3\text{BiS}_3$ .
